# Supplementary material for: Distinct microscopic mechanisms for the accelerated aggregation of pathogenic Tau mutants revealed by kinetic analysis
Source: Royal Society of Chemistry journal article supplement (doi:10.1039/c9cp06083a), 2020-01-01
Supplement: c9cp06083a1.pdf [file c9cp06083a1.pdf]

## **Supporting Information for**

### **Distinct microscopic mechanisms for the accelerated aggregation of pathogenic Tau mutants revealed by kinetic analysis**

Qiong-Qiong Yao<sup>a,c</sup>, Liu Hong<sup>b</sup>, Si Wu<sup>a,c,\*</sup> and Sarah Perrett<sup>a,c,\*</sup>

<sup>a</sup> National Laboratory of Biomacromolecules, CAS Center for Excellence in Biomacromolecules, Institute of Biophysics, Chinese Academy of Sciences, 15 Datun Road, Chaoyang District, Beijing 100101, China.

<sup>b</sup> Zhou Pei-Yuan Center for Applied Mathematics, Tsinghua University, Beijing 100084, China.

<sup>c</sup> University of the Chinese Academy of Sciences, 19A Yuquan Road, Shijingshan District, Beijing 100049, China.

\*Correspondence: sarah.perrett@cantab.net; wusi@ibp.ac.cn

#### **Supporting Information includes:**

1. Figure S1-S2
2. Table S1

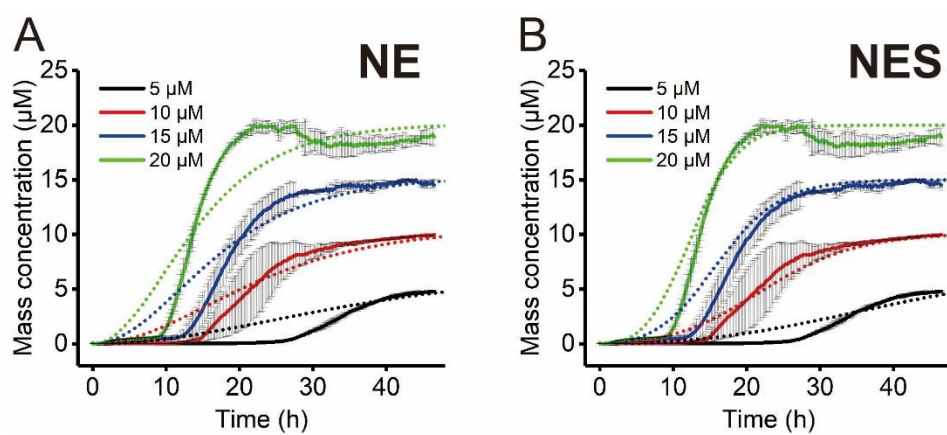

**Fig. S1 Global fitting of fibrillation curves for P301S measured by ThT assay.** NE indicates a nucleation-elongation model, and NES indicates a nucleation-elongation-secondary nucleation model. Neither of the above models give a satisfactory fit to the data compared to a nucleation-elongation-fragmentation-annealing model (Fig. 2).

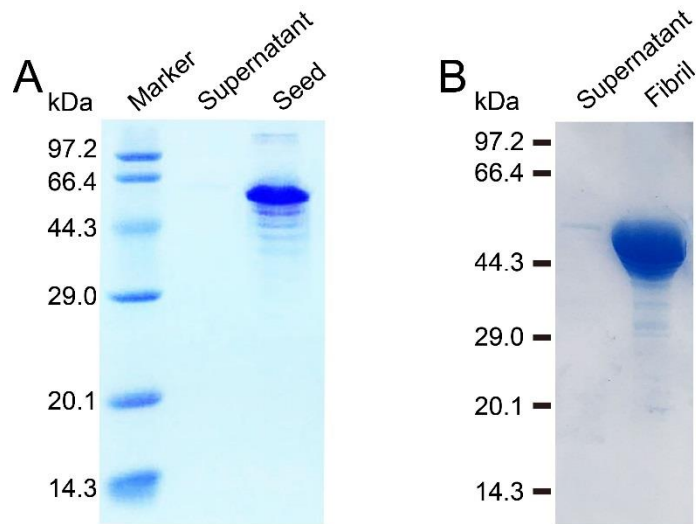

**Fig. S2 SDS-PAGE detection of soluble Tau after sonication and after fibrillization reaches plateau. (A)** The seed solution of P301S was centrifuged at 13,000 rpm for 60 min. A volume of 6  $\mu$ l supernatant and resuspended seeds were each subjected to SDS-PAGE analysis. The result shows that there is no detectable free monomer in solution. **(B)** The P301S sample was centrifuged at 13000 rpm for 30 min after the fibrillization reaction reached plateau. An equal volume of supernatant and resuspended fibrils were subjected to SDS-PAGE analysis. Only a trace amount of soluble protein is present in the supernatant indicating that the equilibrium strongly favors fibril formation.

**Table S1. Fluorescence lifetime of AF488 for AF488/AF594-labeled Tau and its mutants before and after fibril formation.**

| Proteins         | A488 Lifetime (ns) |                 |
|------------------|--------------------|-----------------|
|                  | Long lifetime      | Short lifetime  |
| WT Tau40 monomer | 4.2±0.1 (16.4%)    | 2.0±0.1 (83.6%) |
| P301L monomer    | 4.1±0.1 (17.1%)    | 1.9±0.1 (82.9%) |
| P301S monomer    | 4.2±0.1 (17.3%)    | 2.0±0.1 (82.7%) |
| WT Tau40 fibril  | 4.1±0.2 (7.0%)     | 1.9±0.1 (93.0%) |
| P301L fibril     | 3.8±0.1 (7.2%)     | 1.5±0.1 (92.8%) |
| P301S fibril     | 4.1±0.2(10.6%)     | 1.9±0.1 (89.4%) |
